# Supplementary material for: Trends in harmful drug exposure during pregnancy in France between 2013 and 2019: A nationwide cohort study
Source: PLOS journal article supplement (doi:10.1371/journal.pone.0295897), 2024-01-10

**S1 Figure:** Flow chart.

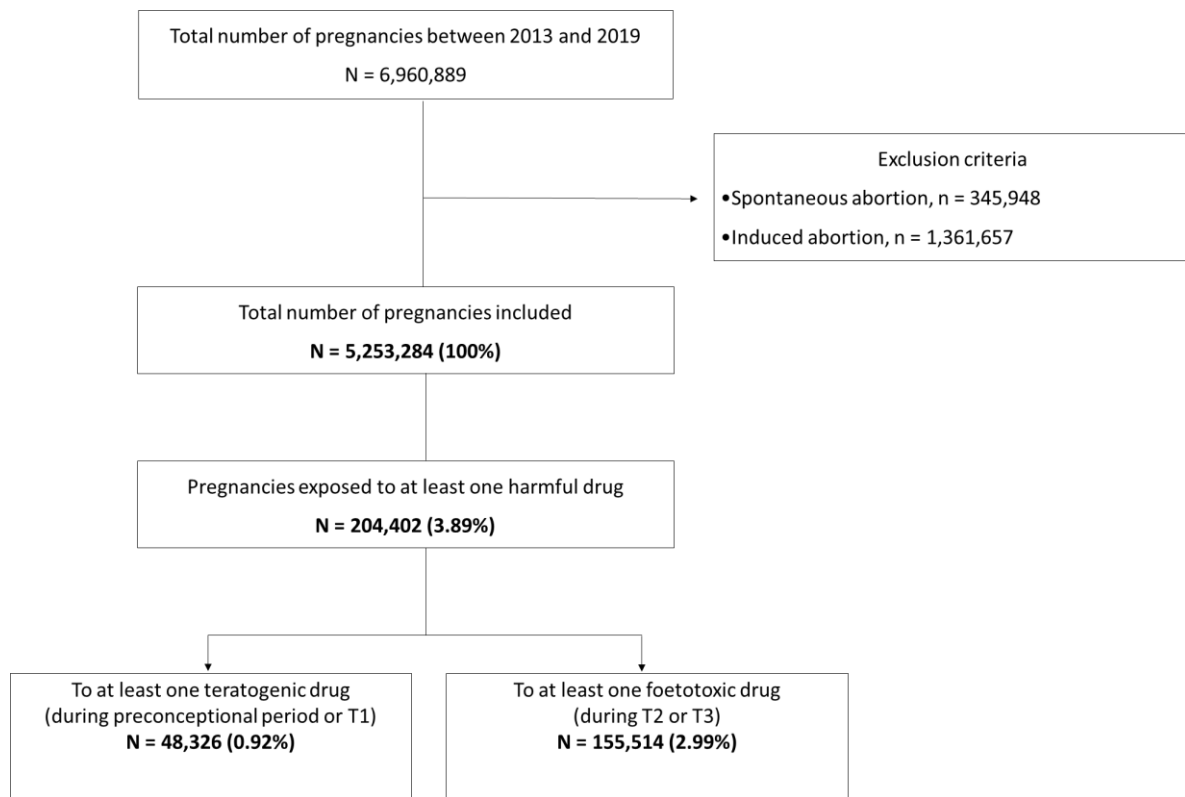

Supplement: S11 (10.1371/journal.pone.0295897.s011) [file journal.pone.0295897.s011]
